# Supplementary material
Source: MDPI journal article supplement (https://www.mdpi.com/2297-8739/10/2/111)
Supplement: s1 [file s1]

## ***Summary of supporting information***

Number of Figures: 3

### **COTENTS**

#### ***Figures***

**Fig. S1.** Structural changes of TTA.

**Fig. S2.** Three DES extractants with different ratios were synthesized and three extractants were added to kerosene with the same volume as the extractant.

**Fig. S3.** The DES extractant (molar ratio: HTTA/TOPO=2/1) was used. The composition of the aqueous phase was 25ppm LiCl and 0.1M NH<sub>4</sub>Cl. The dosage of single HTTA or TOPO is consistent with that of DES extractant.

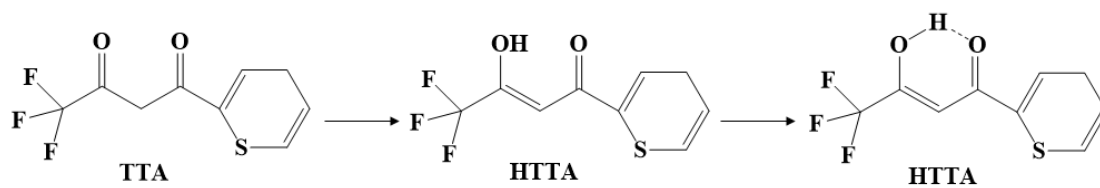

**Fig. S1.** Structural changes of TTA.

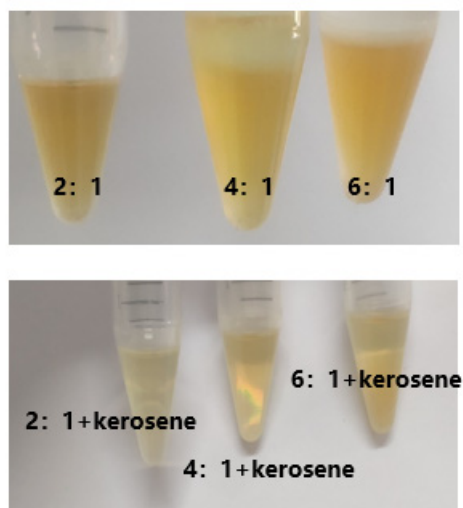

**Fig. S2.** Three DES extractants with different ratios were synthesized and three extractants were added to kerosene with the same volume as the extractant.

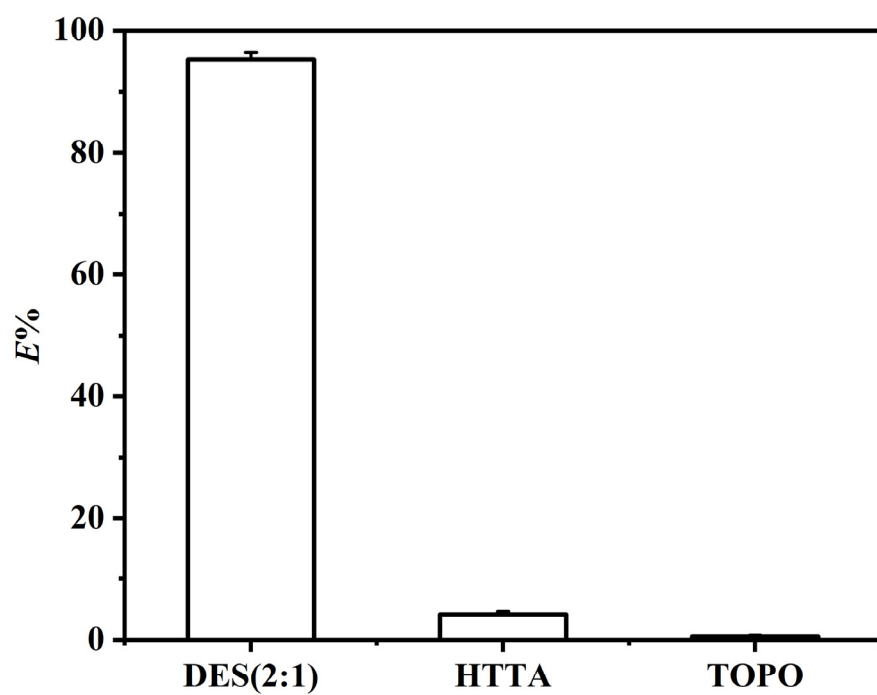

**Fig. S3.** The DES extractant (molar ratio: HTTA/TOPO=2/1) was used. The composition of the aqueous phase was 25ppm LiCl and 0.1M NH<sub>4</sub>Cl. The dosage of single HTTA or TOPO is consistent with that of DES extractant.
